# Supplementary material
Source: PubMed Central journal article supplement (PMC3175257)
Supplement: NIHMS296353-supplement-03.pdf [file NIHMS296353-supplement-03.pdf]

827 **Table S1. Electrophysiological characteristics of CA1 pyramidal neurons from 1 week-old CRND8 mice.**

|                                   | Tg-                   | Tg+                  |
|-----------------------------------|-----------------------|----------------------|
| Resting membrane potential (mV)   | -59.6 ± 0.5 (n = 9)   | -60.2 ± 1.0 (n = 8)  |
| Resting input resistance (MΩ)     | 212.9 ± 16.5 (n = 9)  | 211.9 ± 9.3 (n = 8)  |
| Input resistance at -90 mV (MΩ)   | 137.9 ± 13.6 (n = 8)  | 161.6 ± 9.2 (n = 8)  |
| Input resistance at -80 mV (MΩ)   | 1156.3 ± 13.7 (n = 8) | 175.0 ± 8.6 (n = 8)  |
| Input resistance at -70 mV (MΩ)   | 181.9 ± 14.2 (n = 8)  | 191.9 ± 7.9 (n = 8)  |
| Input resistance at -60 mV (MΩ)   | 231.2 ± 23.5 (n = 8)  | 217.5 ± 8.7 (n = 7)  |
| Anomalous rectification (MΩ/nA)   | 176.2 ± 27.5 (n = 9)  | 143.0 ± 8.9 (n = 8)  |
| Sag (steady state/peak ratio)     | 0.76 ± 0.014 (n = 9)  | 0.77 ± 0.006 (n = 8) |
| Rheobase (pA)                     | 34.7 ± 4.7 (n = 9)    | 36.0 ± 4.6 (n = 8)   |
| Current threshold for 10 APs (pA) | 123.6 ± 18.5 (n = 9)  | 96.7 ± 8.6 (n = 8)   |
| fAHP amplitude (mV)               | 11.2 ± 1.2 (n = 9)    | 10.5 ± 1.5 (n = 8)   |

828 There was no significant difference in any of the above parameters (Mann Whitney test, P > 0.05).

829 **Table S2. Electrophysiological characteristics of CA1 pyramidal neurons from 1 month-old CRND8 mice.**

|                                   | Tg-                   | Tg+                   |
|-----------------------------------|-----------------------|-----------------------|
| Resting membrane potential (mV)   | -63.8 ± 0.6 (n = 14)  | -63.8 ± 0.7 (n = 16)  |
| Resting input resistance (MΩ)     | 125.8 ± 4.0 (n = 14)  | 123.8 ± 5.1 (n = 16)  |
| Input resistance at -90 mV (MΩ)   | 92.8 ± 3.9 (n = 14)   | 87.4 ± 5.5 (n = 16)   |
| Input resistance at -80 mV (MΩ)   | 105.7 ± 3.7 (n = 14)  | 101.5 ± 5.4 (n = 16)  |
| Input resistance at -70 mV (MΩ)   | 124.1 ± 3.9 (n = 14)  | 122.6 ± 5.8 (n = 16)  |
| Input resistance at -60 mV (MΩ)   | 154.4 ± 8.5 (n = 12)  | 155.7 ± 8.7 (n = 14)  |
| Anomalous rectification (MΩ/nA)   | 60.3 ± 3.3 (n = 14)   | 67.6 ± 3.7 (n = 16)   |
| Sag (steady state/peak ratio)     | 0.83 ± 0.009 (n = 14) | 0.83 ± 0.008 (n = 16) |
| Rheobase (pA)                     | 59.8 ± 6.7 (n = 14)   | 64.1 ± 6.8 (n = 16)   |
| Current threshold for 10 APs (pA) | 129.5 ± 11.3 (n = 14) | 136.7 ± 11.0 (n = 16) |
| fAHP amplitude (mV)               | 7.2 ± 0.84 (n = 14)   | 8.2 ± 1.2 (n = 16)    |
| ADP amplitude (mV)                | 11.9 ± 1.1 (n = 14)   | 13.1 ± 0.8 (n = 16)   |
| ADP latency (ms)                  | 3.0 ± 0.07 (n = 14)   | 2.8 ± 0.8 (n = 16)    |
| ADP decay time (ms)               | 19.3 ± 1.4 (n = 14)   | 20.5 ± 1.4 (n = 16)   |

830 There was no significant difference in any of the above parameters (Mann Whitney test, P > 0.05).

831 **Table S3. Neuromab primary antibodies.**

| Target protein | Clone  | Catalog number | Dilution |
|----------------|--------|----------------|----------|
| Kv 1.1         | K20/78 | 75-007         | 1:100    |
| Kv 1.2         | K14/16 | 75-008         | 1:300    |
| Kv 3.1b        | N16b/8 | 75-041         | 1:300    |
| Kv 4.2         | K57/1  | 75-016         | 1:750    |
| Kv 4.3         | K75/41 | 75-017         | 1:300    |
| Slo1           | L6/60  | 75-022         | 1:300    |
| Nav 1.1        | K74/71 | 75-023         | 1:300    |
| Nav 1.2        | K69/3  | 75-024         | 1:300    |

832
